# Supplementary material
Source: PubMed Central journal article supplement (PMC4963525)

**Comparison of two widely-used HPV detection and genotyping methods: GP5+/6+ PCR followed by reverse line blot hybridization and multiplex type-specific E7 PCR**

Gary M. Clifford, Salvatore Vaccarella, Silvia Franceschi, Vanessa Tenet, M. Chantal Umulisa, Ugyen Tshomo, Bolormaa Dondog, Alex Vorsters, Massimo Tommasino, Daniëlle A.M. Heideman, Peter J.F. Snijders, Tarik Gheit

**Supplemental material**

**Supplemental material Fig. S1.** Type-specific prevalence stratified by single and multiple infections for

A) GP5+/6+ RLB and B) E7-MPG

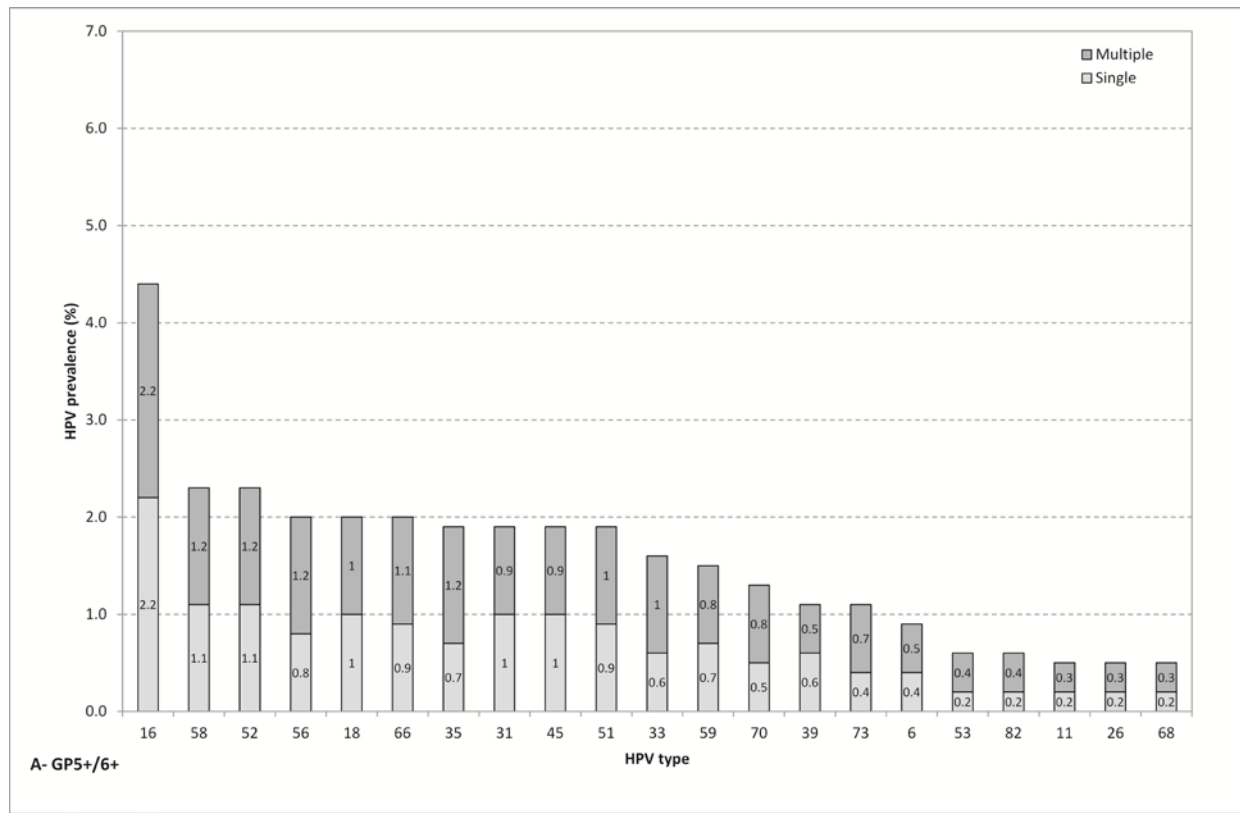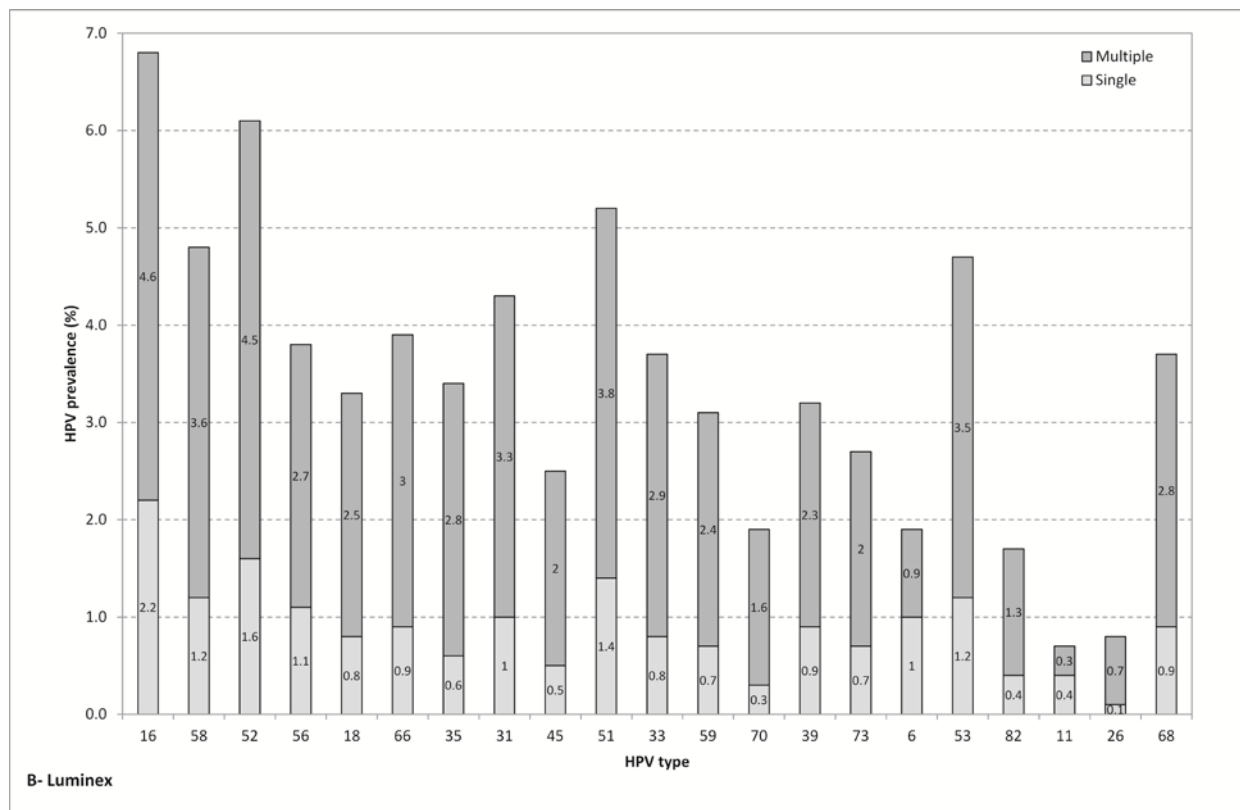

Supplement: JCM.00618-16_zjm999095073so1.pdf [file JCM.00618-16_zjm999095073so1.pdf]
